# Supplementary material for: Fermentation Characteristics, Antinutritional Factor Level and Flavor Compounds of Soybean Whey Yogurt
Source: MDPI journal article supplement (doi:10.3390/foods13020330), 2024-01-20
Supplement: s1 [file s1]

## Supplementary materials

Table S1. Total counts of LAB (CFU/g) for CSWY and CDSWY at different fermentation times

| Fermentation time  | CSWY              | CDSWY             |
|--------------------|-------------------|-------------------|
| 0h (initial point) | $2.2 \times 10^7$ | $2.2 \times 10^7$ |
| 8h (end point)     | $1.9 \times 10^7$ | $3.7 \times 10^8$ |

Table S2. Free amino acids content (mg/mL) of concentrated soybean whey (CSW) and concentrated desalted soybean whey (CDSW).

| Essential amino acid            | CSW               | CDSW              |
|---------------------------------|-------------------|-------------------|
| Threonine                       | $0.07 \pm 0.00^a$ | $0.05 \pm 0.00^b$ |
| Valine                          | $0.10 \pm 0.00^a$ | $0.06 \pm 0.00^b$ |
| Methionine                      | $0.02 \pm 0.00^a$ | $0.02 \pm 0.00^a$ |
| Phenylalanine                   | $0.07 \pm 0.00^a$ | $0.05 \pm 0.00^b$ |
| Isoleucine                      | $0.05 \pm 0.00^a$ | $0.04 \pm 0.00^b$ |
| Leucine                         | $0.08 \pm 0.00^a$ | $0.06 \pm 0.00^b$ |
| Lysine                          | $0.11 \pm 0.00^a$ | $0.04 \pm 0.00^b$ |
| <b>Non-essential amino acid</b> |                   |                   |
| Aspartic acid                   | $0.47 \pm 0.01^a$ | $0.23 \pm 0.00^b$ |
| Glutamic acid                   | $0.55 \pm 0.01^a$ | $0.34 \pm 0.00^b$ |
| Serine                          | $0.02 \pm 0.00^a$ | $0.01 \pm 0.00^b$ |
| Arginine                        | $1.66 \pm 0.02^a$ | $0.30 \pm 0.01^b$ |
| Histidine                       | $0.12 \pm 0.00^a$ | $0.04 \pm 0.00^b$ |
| Glycine                         | $0.05 \pm 0.00^a$ | $0.04 \pm 0.00^b$ |
| Alanine                         | $0.16 \pm 0.00^a$ | $0.12 \pm 0.00^b$ |
| Tyrosine                        | $0.20 \pm 0.00^a$ | $0.16 \pm 0.00^b$ |
| Cysteine                        | $0.02 \pm 0.00^a$ | $0.00 \pm 0.00^b$ |
| Proline                         | $0.04 \pm 0.01^a$ | $0.03 \pm 0.01^a$ |
| $\Sigma$ FAAs                   | $3.78 \pm 0.04^a$ | $1.59 \pm 0.01^b$ |
